# Supplementary material for: Feasibility analysis of using inverse modeling for estimating field-scale evapotranspiration in maize and soybean fields from soil water content monitoring networks
Source: Copernicus journal article supplement (doi:10.5194/hess-2016-437), 2016-08-26
Supplement: Supplementary file 1 [file hess-2016-437-supplement.pdf]

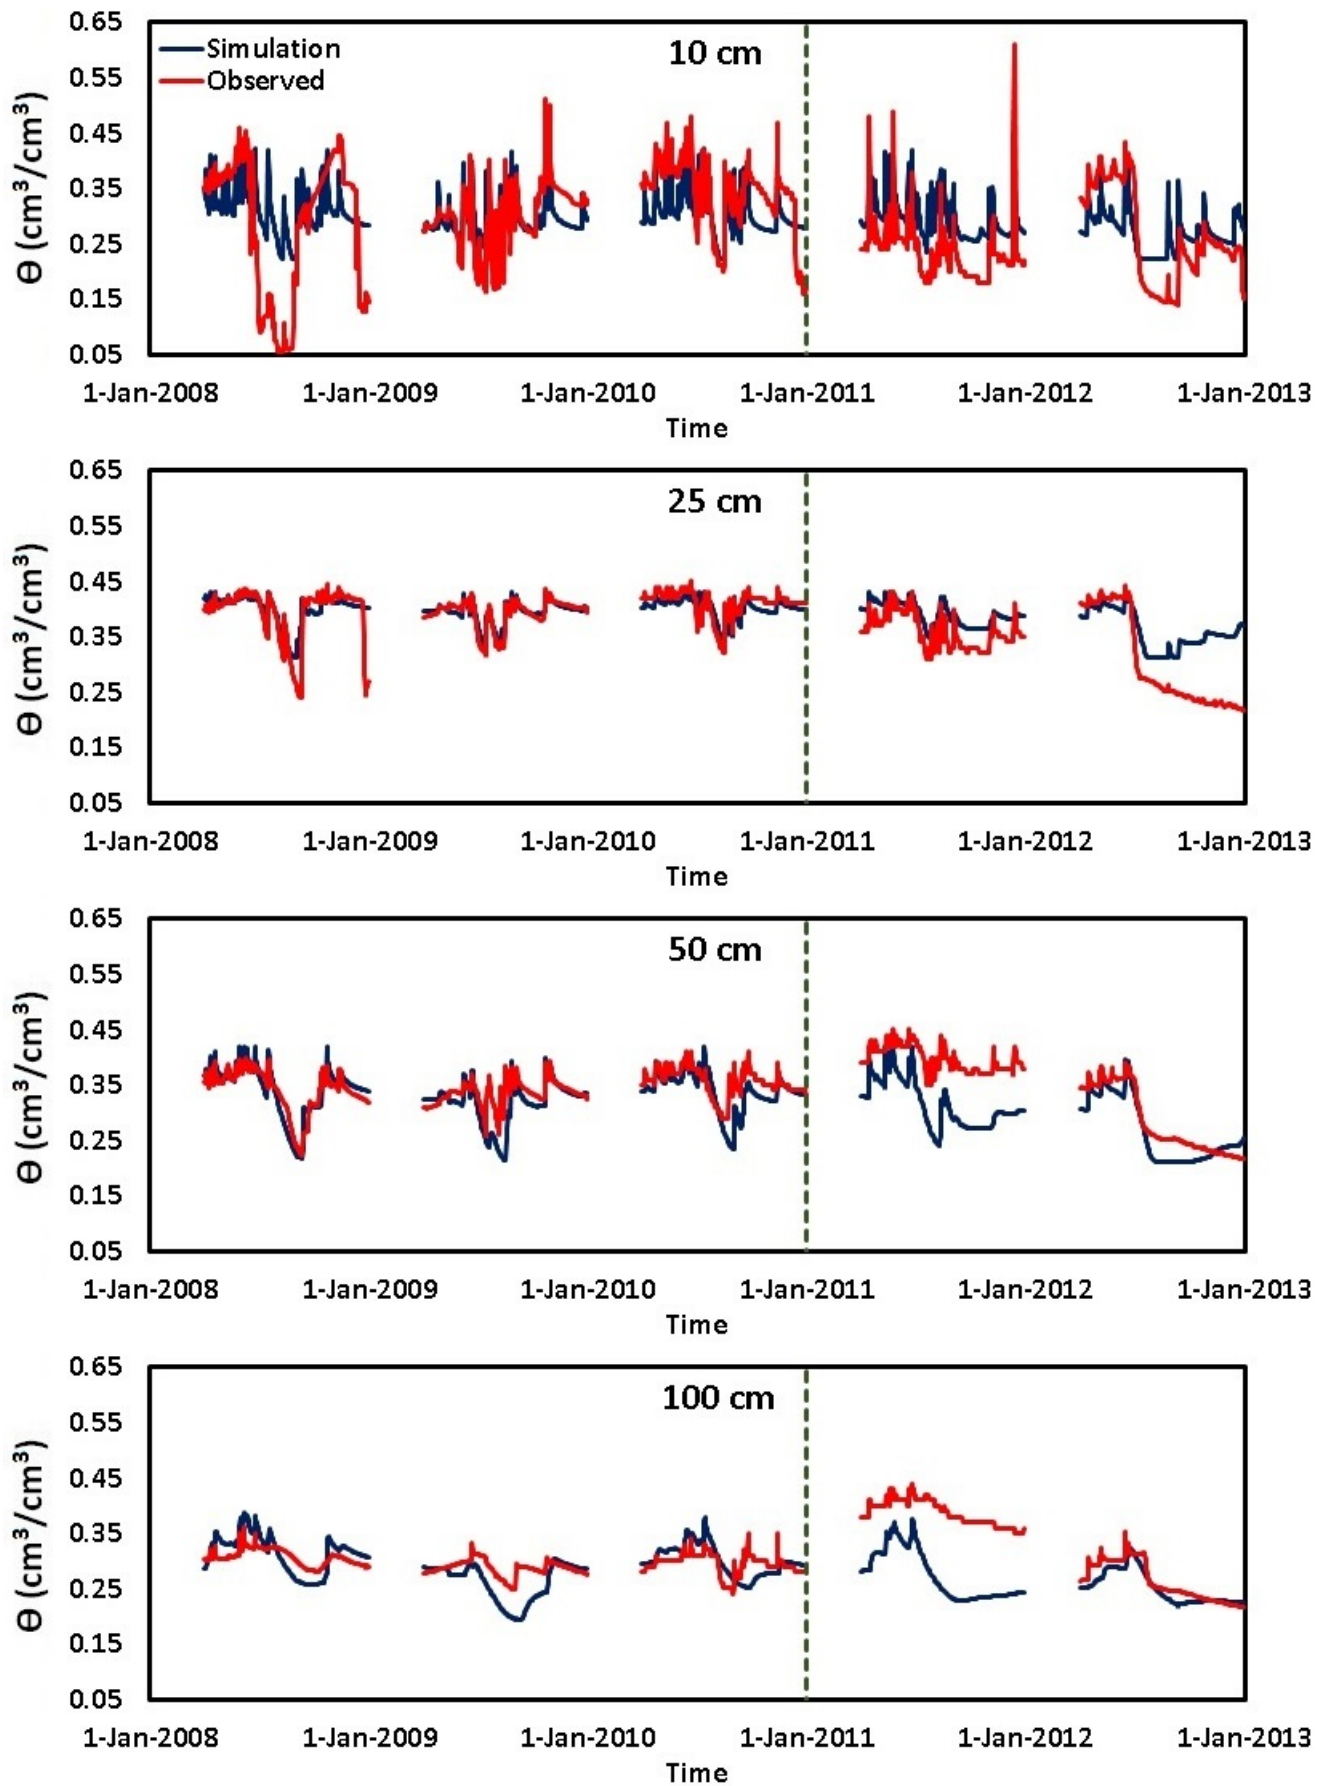

Figure S1. Daily observed and simulated *SWC* ( $\theta$ ) during the calibration (2008–2010) and validation (2011–2012) periods at TP 2 location.

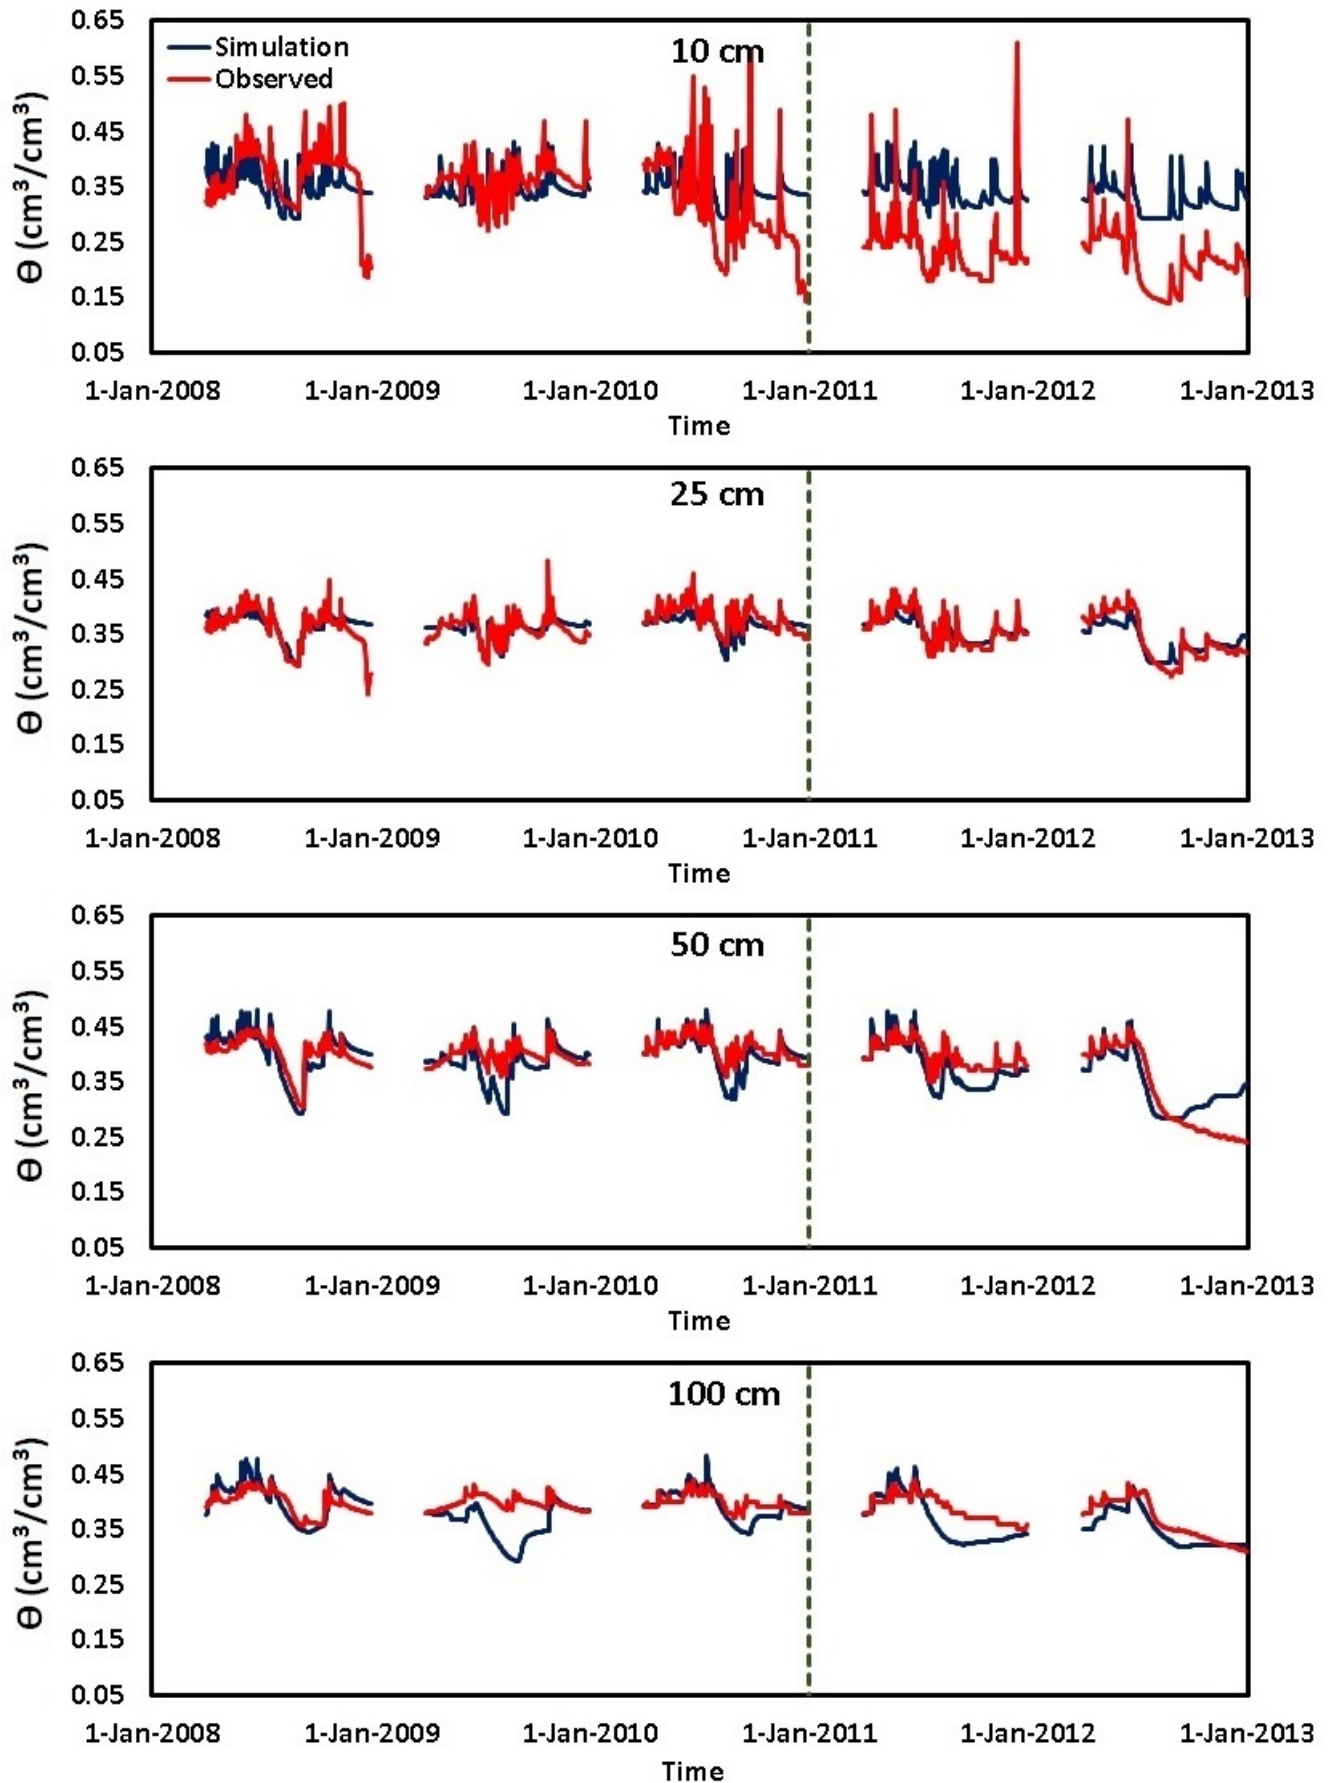

Figure S2. Daily observed and simulated *SWC* ( $\theta$ ) during the calibration (2008–2010) and validation (2011–2012) periods at TP 3 location.

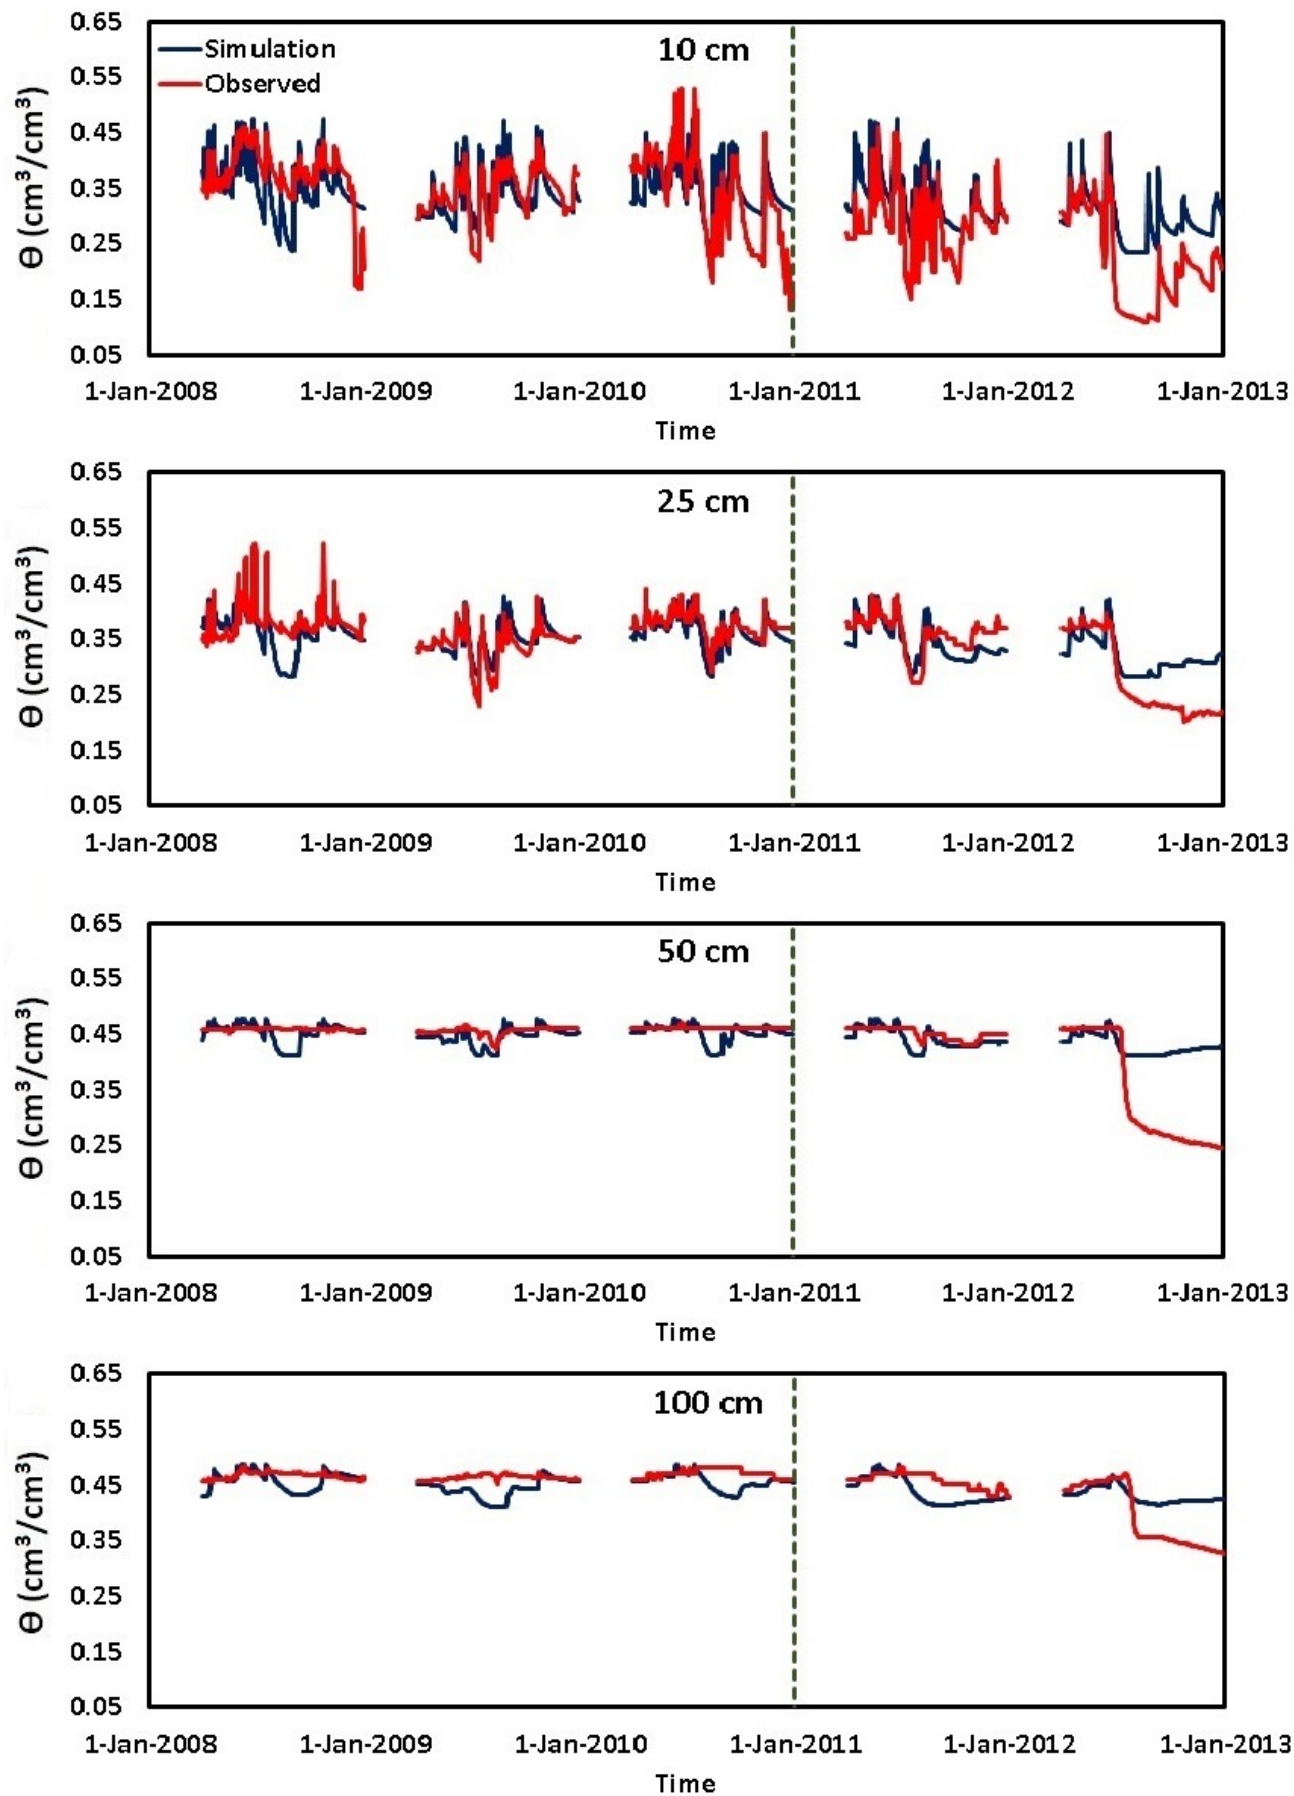

Figure S3. Daily observed and simulated *SWC* ( $\theta$ ) during the calibration (2008–2010) and validation (2011–2012) periods at TP 4 location.

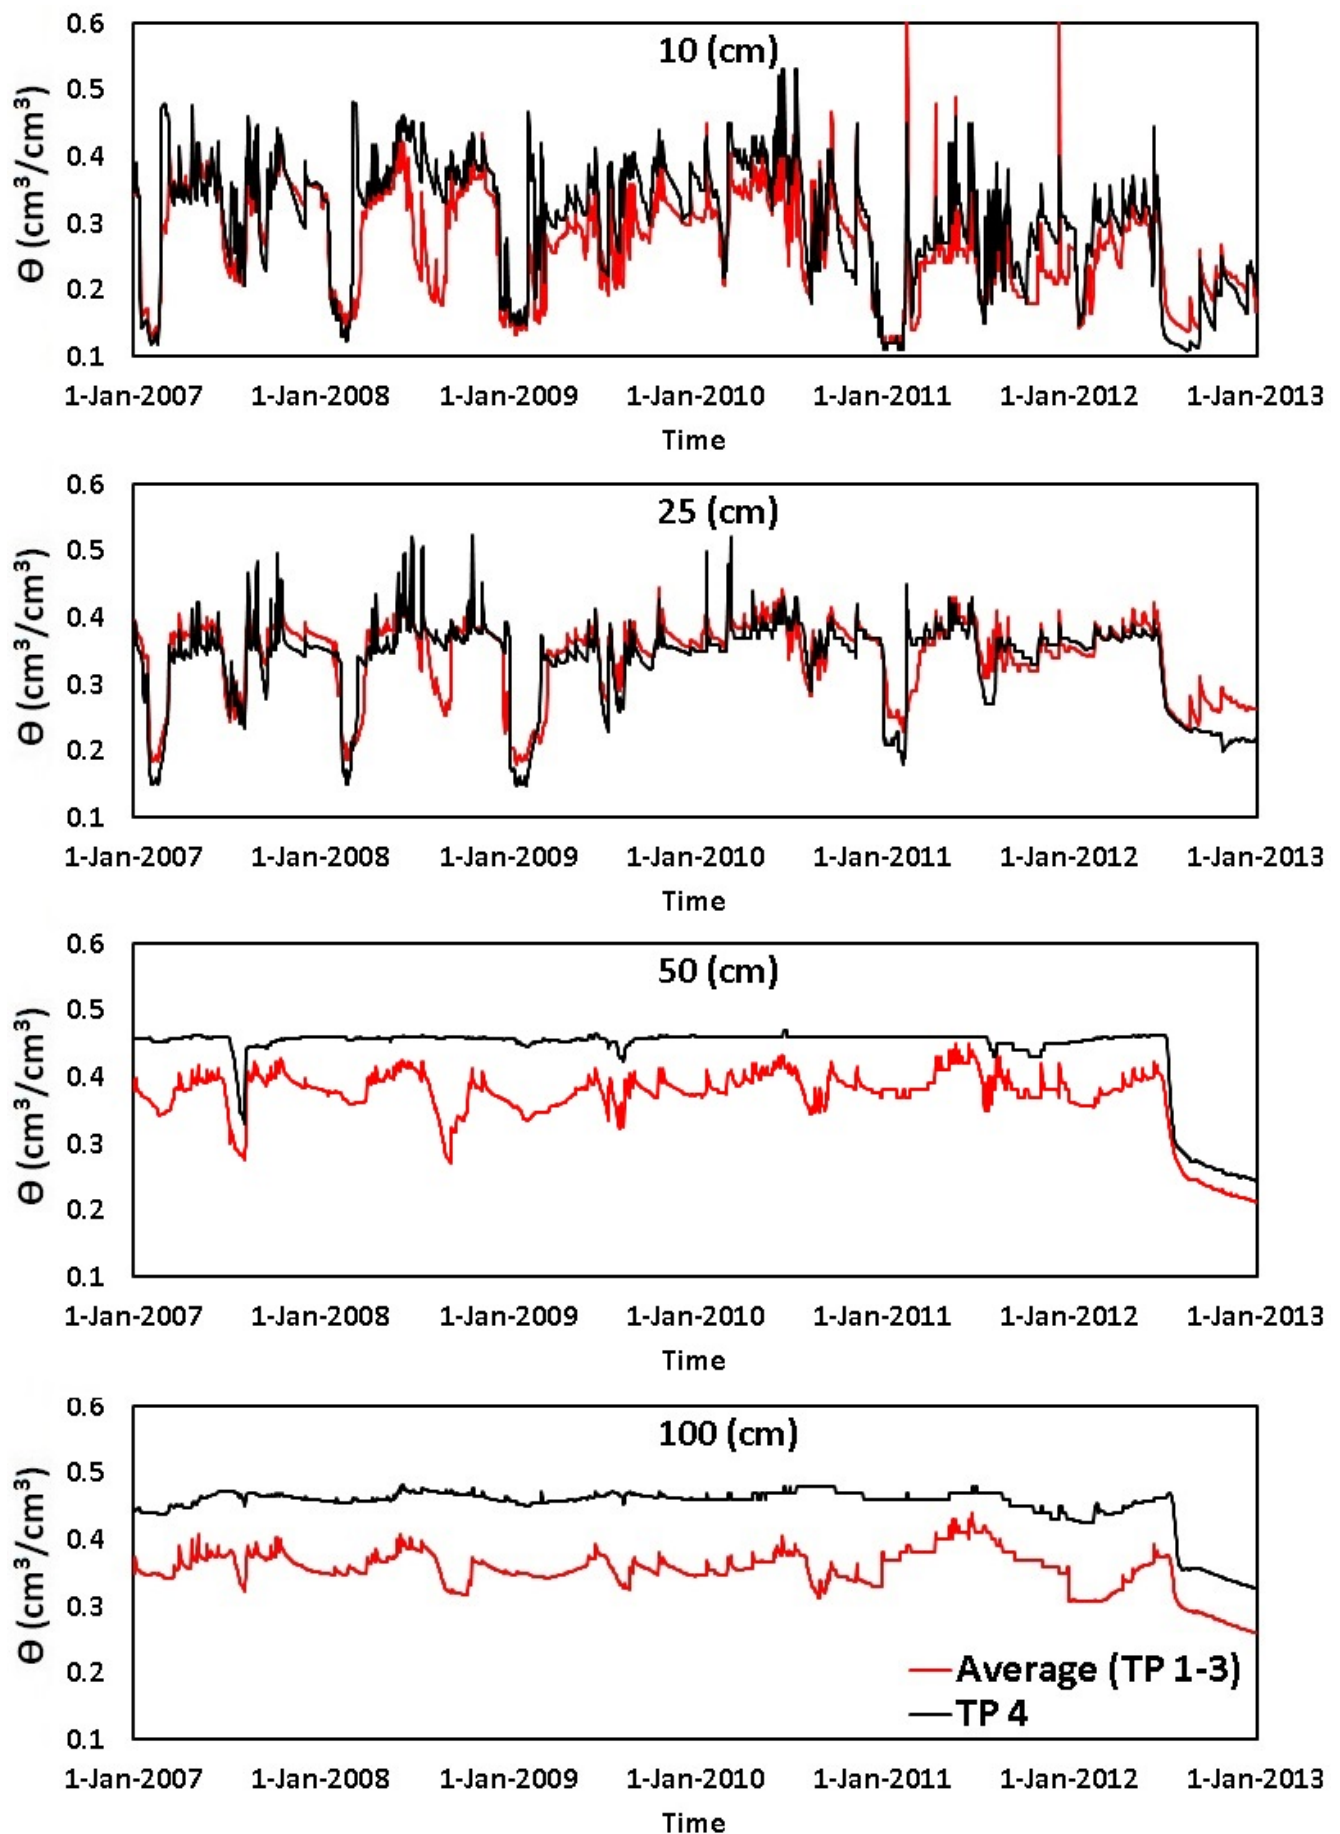

Figure S4. Daily observed *SWC* ( $\theta$ ) at TP 4 location versus the average observed *SWC* ( $\theta$ ) at the other three locations (TP 1-3) during study period.
